# Supplementary material for: Machine learning methods for perioperative anesthetic management in cardiac surgery patients: a scoping review
Source: PubMed Central journal article supplement — J Thorac Dis. 2021 Dec;13(12):6976–93. doi: 10.21037/jtd-21-765 (PMC8743411; doi:10.21037/jtd-21-765), 2021-12
Supplement: jtd-13-12-6976-supplementary.pdf [file jtd-13-12-6976-supplementary.pdf]

## Appendix 1 Search summary

Performed on: February 25, 2021  
 With the help of: Faridi Jamaludin, Amsterdam UMC, Medical Library AMC

## Databases:

| MEDLINE (Ovid), EMBASE (Ovid), Cochrane Library | Before deduplication | After deduplication |
|-------------------------------------------------|----------------------|---------------------|
| Total                                           | 1,562                | 1,142               |

## MEDLINE (Ovid)

Database(s): Ovid MEDLINE(R) ALL; 1947 to

## Search Strategy:

| #  | Searches                                                                                                                                                                                                                                                                                                                                                                                                                                                                                           | Results   |
|----|----------------------------------------------------------------------------------------------------------------------------------------------------------------------------------------------------------------------------------------------------------------------------------------------------------------------------------------------------------------------------------------------------------------------------------------------------------------------------------------------------|-----------|
| 1  | exp Thoracic Surgical Procedures/ or Thoracic Surgery/ or exp Cardiovascular Surgical Procedures/ or exp Cardiac Surgical Procedures/ or exp Thoracic Diseases/                                                                                                                                                                                                                                                                                                                                    | 551,140   |
| 2  | ((cardi* or heart or vascular or thoracic* or thorax) adj3 (surg* or operat*)).ti,ab,kw,kf.                                                                                                                                                                                                                                                                                                                                                                                                        | 137,200   |
| 3  | 1 or 2                                                                                                                                                                                                                                                                                                                                                                                                                                                                                             | 612,707   |
| 4  | exp Artificial Intelligence/                                                                                                                                                                                                                                                                                                                                                                                                                                                                       | 107,748   |
| 5  | (artificial intelligence or machine learning or deep learning or deep neural network or neural network* or machine intelligence or computational intelligence or computer reasoning or predictive analytics or cognitive comput* or computer vision system* or naive bayes or bayesian learning or support vector* or automated or automatic or random forest* or boosting or automatic anesthe* or automatic anaesthe* or automated cardiac anesthe* or automated cardiac anaesthe*).ti,ab,kw,kf. | 309,465   |
| 6  | 4 or 5                                                                                                                                                                                                                                                                                                                                                                                                                                                                                             | 365,261   |
| 7  | exp Anesthesia/ or Anesthesiology/                                                                                                                                                                                                                                                                                                                                                                                                                                                                 | 209,295   |
| 8  | (anesth* or anaesthes* or intraoperat*).ti,ab,kw,kf.                                                                                                                                                                                                                                                                                                                                                                                                                                               | 479,483   |
| 9  | (undergo* adj3 (surg* or operat* or replac*)).ti,ab,kw,kf.                                                                                                                                                                                                                                                                                                                                                                                                                                         | 107,044   |
| 10 | 7 or 8 or 9                                                                                                                                                                                                                                                                                                                                                                                                                                                                                        | 632,036   |
| 11 | 3 and 6 and 10                                                                                                                                                                                                                                                                                                                                                                                                                                                                                     | 680       |
| 12 | (exp Animals/ or exp Animal Experimentation/ or exp models, animal/ or (rat or rats or mice or mouse or dog or dogs or pig or pigs or cow or cows or monkey or monkeys or goat or goats or horse or horses or ape or apes or gorilla or gorillas).ti,ab,kw.) not (Humans/ or human*.ti,ab,kw.)                                                                                                                                                                                                     | 4,735,867 |
| 13 | 11 not 12                                                                                                                                                                                                                                                                                                                                                                                                                                                                                          | 653       |
| 14 | comment/ or editorial/ or letter/ or (letter or comment* or editorial).ti.                                                                                                                                                                                                                                                                                                                                                                                                                         | 2,019,154 |
| 15 | 13 not 14                                                                                                                                                                                                                                                                                                                                                                                                                                                                                          | 648       |

EMBASE (Ovid)

Database(s): EMBASE Classic + EMBASE; 1947 to February 25, 2021

Search Strategy:

| #  | Searches                                                                                                                                                                                                                                                                                                                                                                                                                                                                                        | Results   |
|----|-------------------------------------------------------------------------------------------------------------------------------------------------------------------------------------------------------------------------------------------------------------------------------------------------------------------------------------------------------------------------------------------------------------------------------------------------------------------------------------------------|-----------|
| 1  | exp thorax surgery/ or exp cardiovascular surgery/ or exp heart surgery/ or exp thorax disease/                                                                                                                                                                                                                                                                                                                                                                                                 | 1,154,605 |
| 2  | ((cardi* or heart or vascular or thoracic* or thorax) adj3 (surg* or operat*)).ti,ab,kw.                                                                                                                                                                                                                                                                                                                                                                                                        | 220,373   |
| 3  | 1 or 2                                                                                                                                                                                                                                                                                                                                                                                                                                                                                          | 1,212,463 |
| 4  | exp artificial intelligence/ or exp machine learning/                                                                                                                                                                                                                                                                                                                                                                                                                                           | 253,856   |
| 5  | (artificial intelligence or machine learning or deep learning or deep neural network or neural network* or machine intelligence or computational intelligence or computer reasoning or predictive analytics or cognitive comput* or computer vision system* or naive bayes or bayesian learning or support vector* or automated or automatic or random forest* or boosting or automatic anesthe* or automatic anaesthe* or automated cardiac anesthe* or automated cardiac anaesthe*).ti,ab,kw. | 418,467   |
| 6  | 4 or 5                                                                                                                                                                                                                                                                                                                                                                                                                                                                                          | 552,770   |
| 7  | exp anesthesia/ or cardiac anesthesia/ or anesthesiology/ or receiver operating characteristic/                                                                                                                                                                                                                                                                                                                                                                                                 | 552,219   |
| 8  | (anesth* or anaesthes* or intraoperat*).ti,ab,kw.                                                                                                                                                                                                                                                                                                                                                                                                                                               | 682,092   |
| 9  | (undergo* adj3 (surg* or operat* or replac*)).ti,ab,kw.                                                                                                                                                                                                                                                                                                                                                                                                                                         | 161,477   |
| 10 | 7 or 8 or 9                                                                                                                                                                                                                                                                                                                                                                                                                                                                                     | 1,079,643 |
| 11 | 3 and 6 and 10                                                                                                                                                                                                                                                                                                                                                                                                                                                                                  | 1,231     |
| 12 | (exp animal/ or exp animal experiment/ or exp animal model/ or (rat or rats or mice or mouse or dog or dogs or pig or pigs or cow or cows or monkey or monkeys or goat or goats or horse or horses or ape or apes or gorilla or gorillas).ti,ab,kw.) not (human/ or human*.ti,ab,kw.)                                                                                                                                                                                                           | 5,723,322 |
| 13 | 11 not 12                                                                                                                                                                                                                                                                                                                                                                                                                                                                                       | 1,183     |
| 14 | letter/ or editorial/ or note/ or (letter or comment* or editorial).ti.                                                                                                                                                                                                                                                                                                                                                                                                                         | 2,684,107 |
| 15 | 13 not 14                                                                                                                                                                                                                                                                                                                                                                                                                                                                                       | 1,169     |
| 16 | limit 15 to conference abstract status                                                                                                                                                                                                                                                                                                                                                                                                                                                          | 401       |
| 17 | 15 not 16                                                                                                                                                                                                                                                                                                                                                                                                                                                                                       | 768       |

| #  | Searches                                                                                                                                                                                                                                                                                                                                                                                                                                                                                       | Results |
|----|------------------------------------------------------------------------------------------------------------------------------------------------------------------------------------------------------------------------------------------------------------------------------------------------------------------------------------------------------------------------------------------------------------------------------------------------------------------------------------------------|---------|
| 1  | MeSH descriptor: [Thoracic Surgical Procedures] explode all trees                                                                                                                                                                                                                                                                                                                                                                                                                              | 15,672  |
| 2  | MeSH descriptor: [Thoracic Surgery] explode all trees                                                                                                                                                                                                                                                                                                                                                                                                                                          | 164     |
| 3  | MeSH descriptor: [Cardiovascular Surgical Procedures] explode all trees                                                                                                                                                                                                                                                                                                                                                                                                                        | 19,951  |
| 4  | MeSH descriptor: [Cardiac Surgical Procedures] explode all trees                                                                                                                                                                                                                                                                                                                                                                                                                               | 12,945  |
| 5  | MeSH descriptor: [Thoracic Diseases] explode all trees                                                                                                                                                                                                                                                                                                                                                                                                                                         | 172     |
| 6  | ((cardi* or heart or vascular or thoracic* or thorax) near/3 (surg* or operat*)):ti,ab,kw                                                                                                                                                                                                                                                                                                                                                                                                      | 22,803  |
| 7  | #1 or #2 or #3 or #4 or #5 or #6                                                                                                                                                                                                                                                                                                                                                                                                                                                               | 39,277  |
| 8  | MeSH descriptor: [Artificial Intelligence] explode all trees                                                                                                                                                                                                                                                                                                                                                                                                                                   | 1,062   |
| 9  | (artificial intelligence or machine learning or deep learning or deep neural network or neural network* or machine intelligence or computational intelligence or computer reasoning or predictive analytics or cognitive comput* or computer vision system* or naive bayes or bayesian learning or support vector* or automated or automatic or random forest* or boosting or automatic anesthe* or automatic anaesthe* or automated cardiac anesthe* or automated cardiac anaesthe*):ti,ab,kw | 23,612  |
| 10 | #8 or #9                                                                                                                                                                                                                                                                                                                                                                                                                                                                                       | 24,277  |
| 11 | (anesth* or anaesthes* or intraoperat*):ti,ab,kw                                                                                                                                                                                                                                                                                                                                                                                                                                               | 98,381  |
| 12 | (undergo* near/3 (surg* or operat* or replac*)):ti,ab,kw                                                                                                                                                                                                                                                                                                                                                                                                                                       | 29,516  |
| 13 | #11 or #12                                                                                                                                                                                                                                                                                                                                                                                                                                                                                     | 114,026 |
| 14 | #7 and #10 and #13                                                                                                                                                                                                                                                                                                                                                                                                                                                                             | 150     |
